# Supplementary material
Source: MDPI journal article supplement (https://www.mdpi.com/2073-4441/14/15/2354)
Supplement: s1 [file s1]

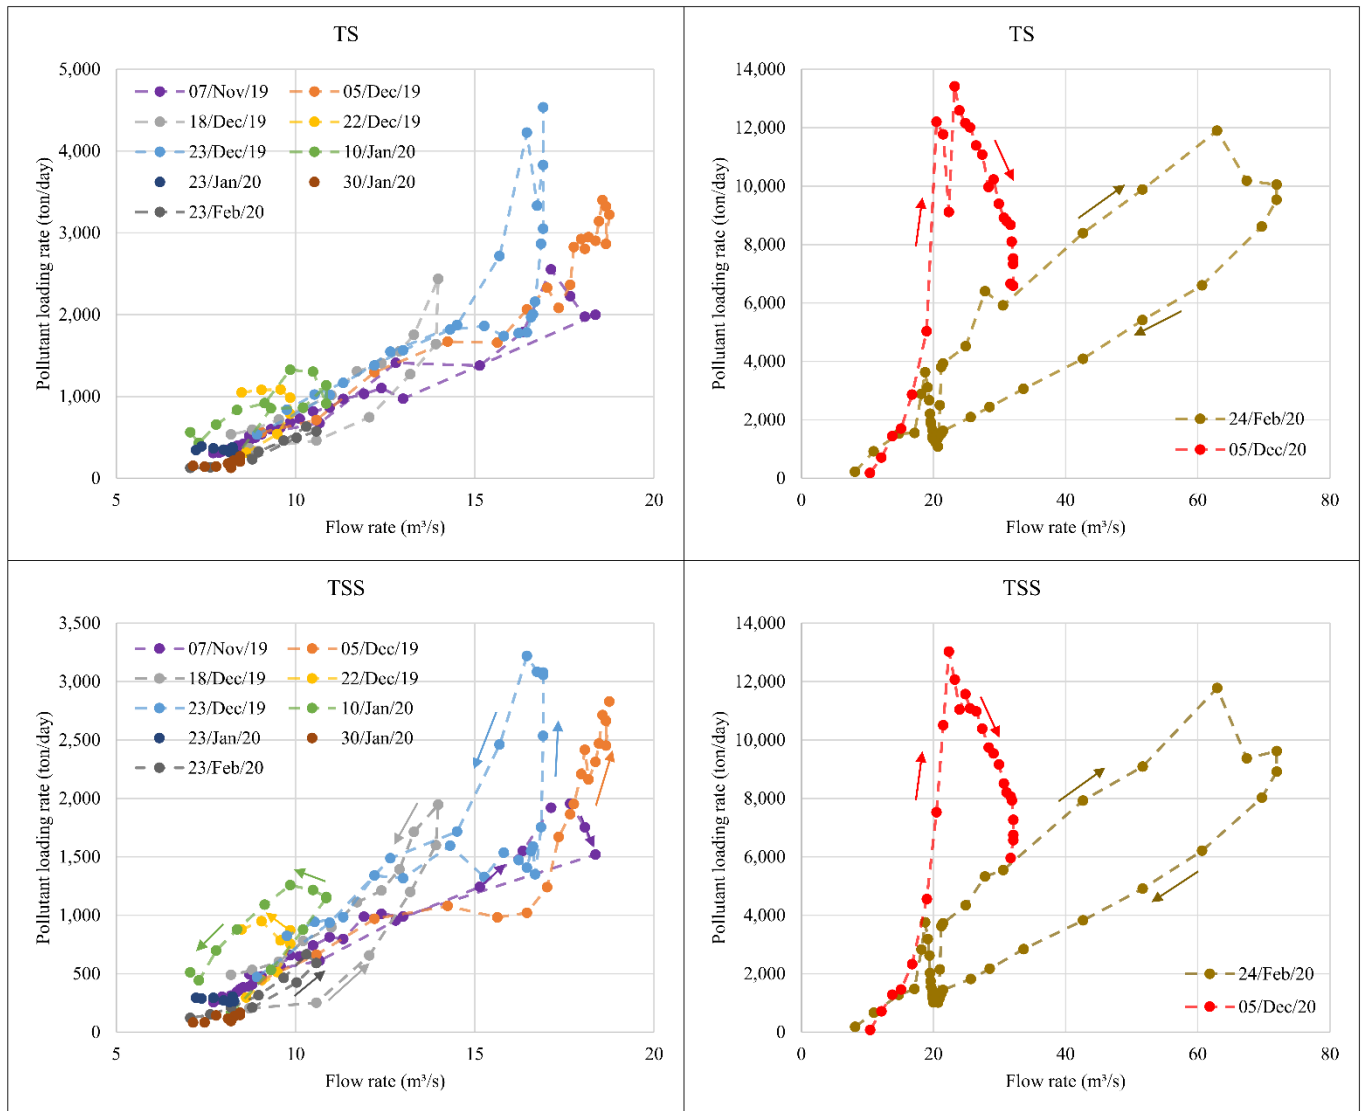

**Figure S1.** Solid loadings observed in the Riacho Fundo stream.

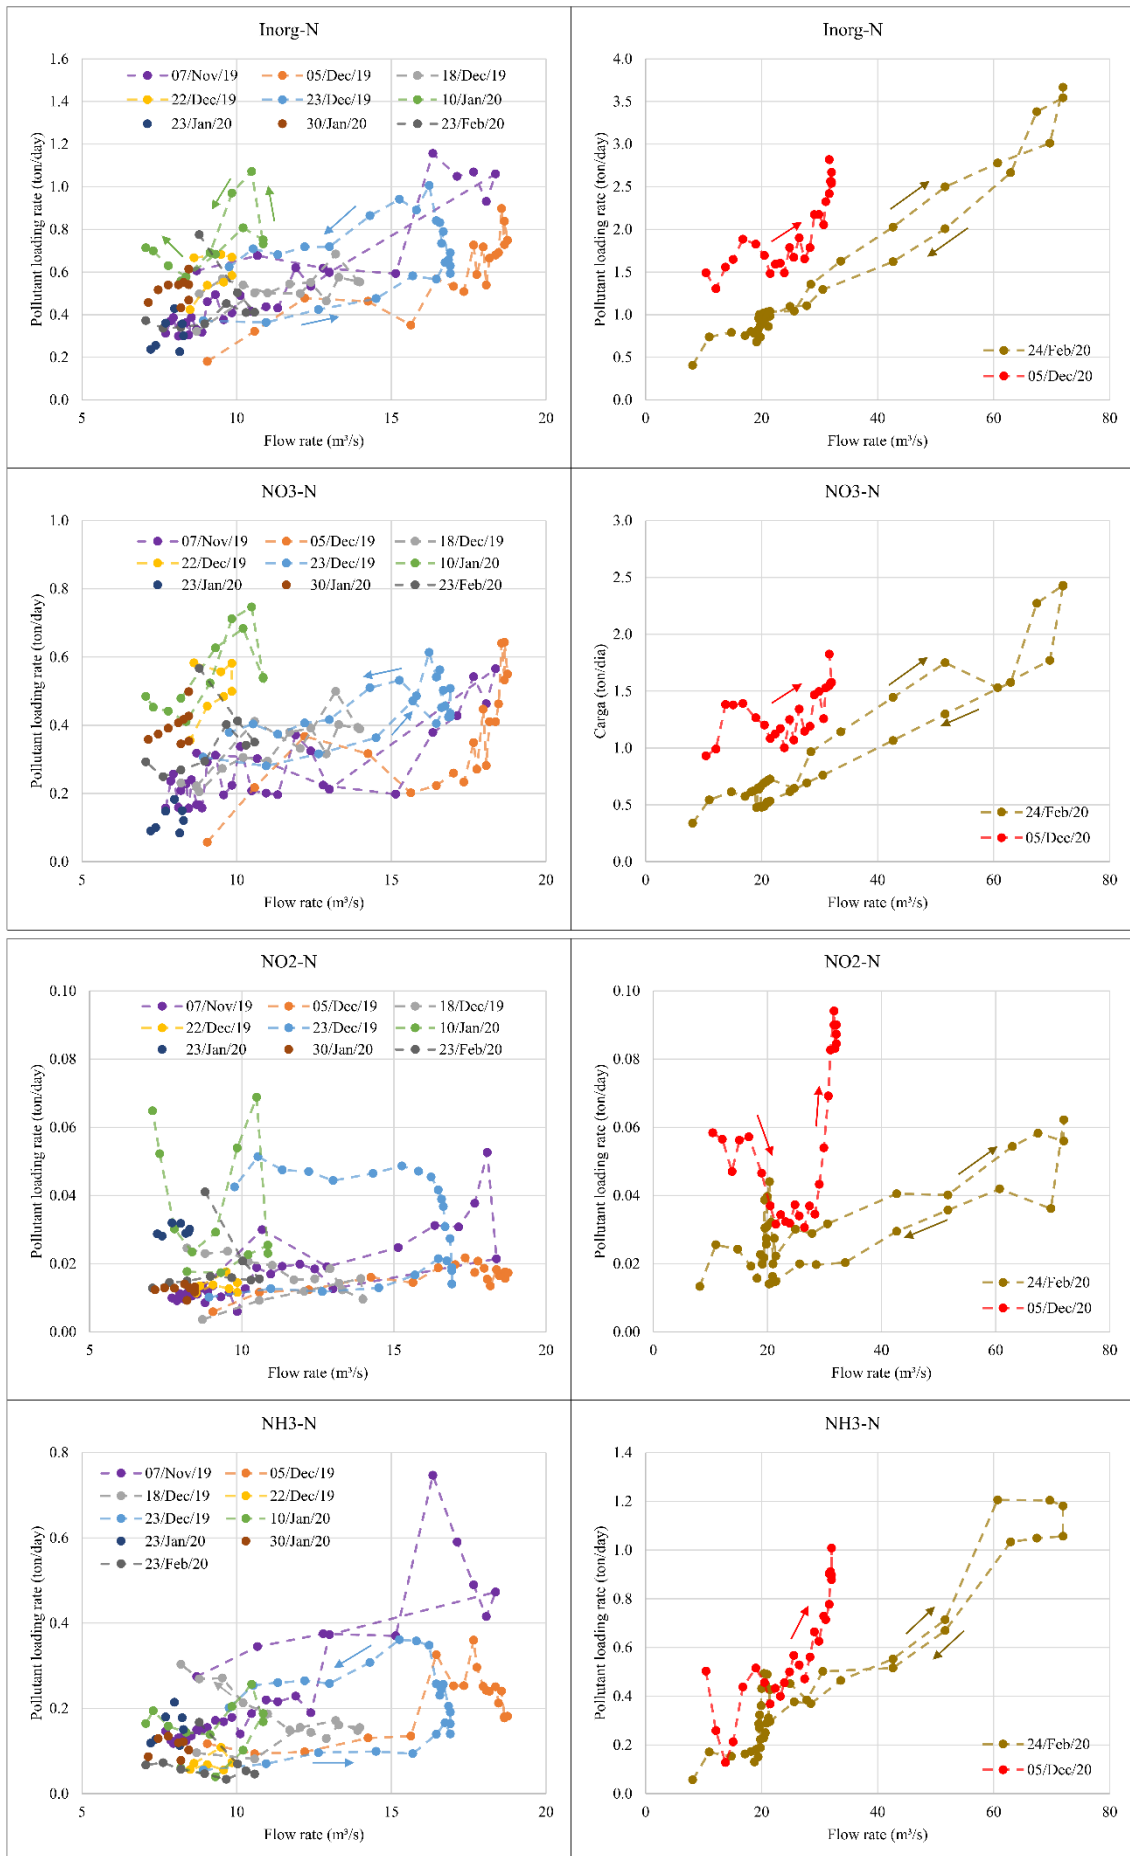

**Figure S2.** Nitrogen loadings observed in the Riacho Fundo stream.

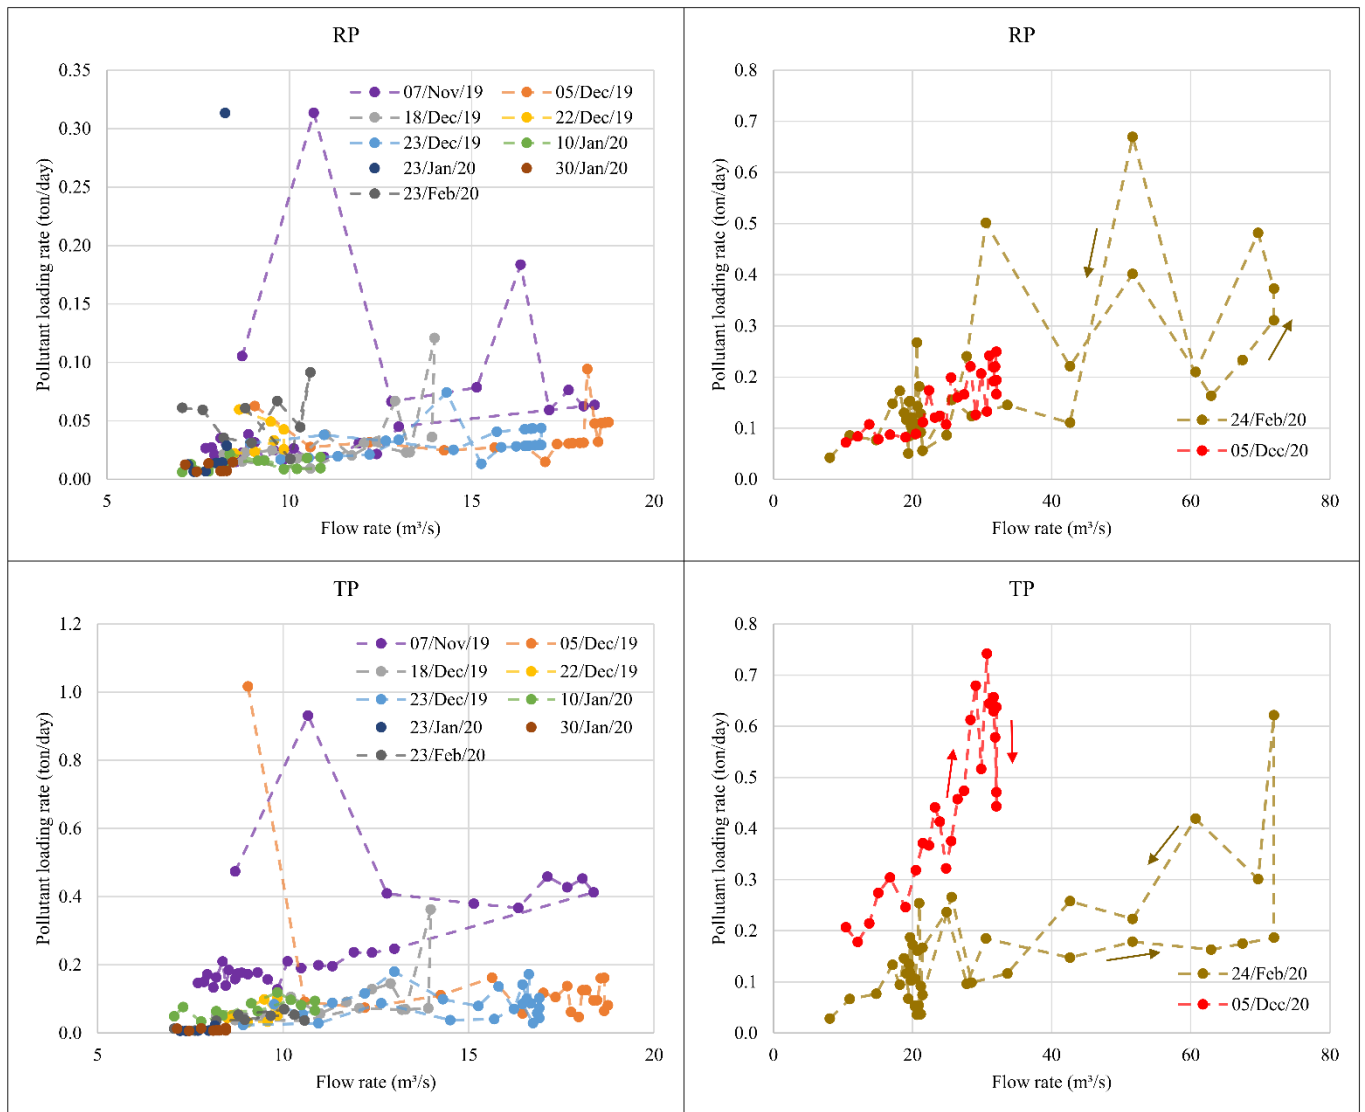

**Figure S3.** Phosphorus loadings observed in the Riacho Fundo stream.

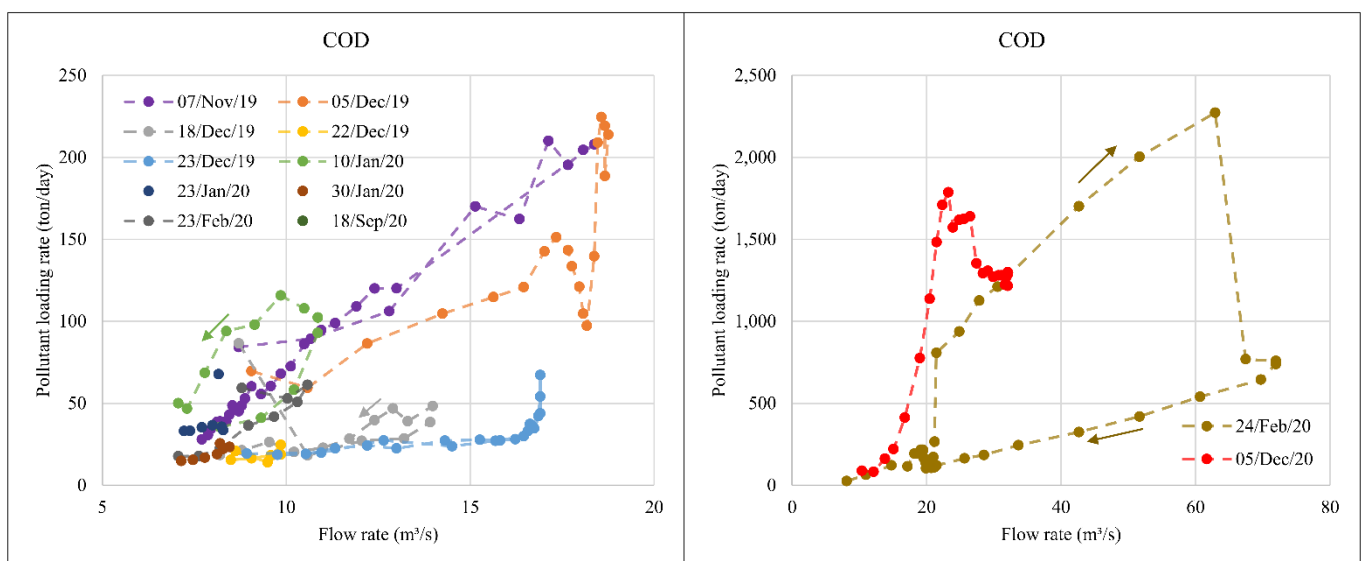

**Figure S4.** COD loadings observed in the Riacho Fundo stream.

**Table S1.** Correlation between rainfall and flood characteristics and event mean concentrations (EMCs) in the Riacho Fundo watershed.

|                |                    | EMC   |       |       |                    |                    |                    |         |          |         | Flow rate |       | Flood    | Mean rainfall |          |           | Mean |
|----------------|--------------------|-------|-------|-------|--------------------|--------------------|--------------------|---------|----------|---------|-----------|-------|----------|---------------|----------|-----------|------|
|                |                    | COD   | TS    | TSS   | NO <sub>2</sub> -N | NO <sub>3</sub> -N | NH <sub>3</sub> -N | Inorg-N | React. P | Total P | Mean      | Max   | duration | Volume        | Duration | Intensity | ADD  |
| EMC            | COD                | 1.00  |       |       |                    |                    |                    |         |          |         |           |       |          |               |          |           |      |
|                | TS                 | 0.88  | 1.00  |       |                    |                    |                    |         |          |         |           |       |          |               |          |           |      |
|                | TSS                | 0.90  | 0.99  | 1.00  |                    |                    |                    |         |          |         |           |       |          |               |          |           |      |
|                | NO <sub>2</sub> -N | 0.03  | -0.10 | -0.05 | 1.00               |                    |                    |         |          |         |           |       |          |               |          |           |      |
|                | NO <sub>3</sub> -N | 0.28  | 0.20  | 0.25  | 0.19               | 1.00               |                    |         |          |         |           |       |          |               |          |           |      |
|                | NH <sub>3</sub> -N | 0.57  | 0.45  | 0.51  | 0.31               | -0.19              | 1.00               |         |          |         |           |       |          |               |          |           |      |
|                | Inorg-N            | 0.47  | 0.35  | 0.42  | 0.35               | 0.93               | 0.17               | 1.00    |          |         |           |       |          |               |          |           |      |
|                | Reactive P         | 0.40  | 0.18  | 0.17  | 0.11               | -0.27              | 0.18               | -0.20   | 1.00     |         |           |       |          |               |          |           |      |
|                | Total P            | 0.52  | 0.50  | 0.52  | -0.13              | 0.04               | 0.63               | 0.25    | 0.10     | 1.00    |           |       |          |               |          |           |      |
| Flow rate      | Mean               | 0.71  | 0.68  | 0.69  | -0.34              | -0.03              | 0.37               | 0.07    | 0.38     | 0.35    | 1.00      |       |          |               |          |           |      |
|                | Maximum            | 0.44  | 0.41  | 0.43  | -0.40              | -0.14              | 0.19               | -0.10   | 0.38     | 0.15    | 0.93      | 1.00  |          |               |          |           |      |
| Flood duration |                    | 0.16  | 0.25  | 0.22  | -0.35              | -0.67              | 0.28               | -0.59   | 0.23     | 0.12    | 0.53      | 0.58  | 1.00     |               |          |           |      |
| Mean* rainfall | Volume             | 0.43  | 0.43  | 0.43  | -0.32              | -0.40              | 0.46               | -0.26   | 0.32     | 0.43    | 0.83      | 0.83  | 0.84     | 1.00          |          |           |      |
|                | Duration           | -0.06 | -0.03 | -0.07 | -0.12              | -0.73              | 0.08               | -0.71   | 0.25     | -0.29   | 0.21      | 0.30  | 0.86     | 0.53          | 1.00     |           |      |
|                | Intensity          | 0.52  | 0.46  | 0.53  | 0.49               | 0.72               | 0.40               | 0.87    | -0.20    | 0.45    | 0.17      | -0.02 | -0.36    | -0.01         | -0.53    | 1.00      |      |
| Mean* ADD      |                    | 0.88  | 0.86  | 0.87  | -0.02              | 0.36               | 0.41               | 0.49    | 0.29     | 0.45    | 0.45      | 0.15  | -0.12    | 0.06          | -0.29    | 0.43      | 1.00 |

\* Among raingages.

Color legend:

|       |                                |
|-------|--------------------------------|
| 1.00  | strongest positive correlation |
| 0.00  | weakest correlation            |
| -1.00 | strongest negative correlation |
